# Supplementary material
Source: publisher figshare collection journal article supplement (https://f1000.figshare.com/articles/dataset/_/730373)
Supplement: Supplementary file 1 [file 1]

AUC\_30: area under the temperature curve over 30 minutes  
Maxtemp\_30: maximal temperature over 30 minutes  
age: age at time of operation  
sex: gender (0=male, 1=female)  
length: length (in cm)  
weight: weight (in kg)  
optime: operation time (minutes)  
TRNT: time to removal of nasogastric tube (days)  
WBC\_postop: leucocyte count one day after operation  
AST\_postop: AST level one day after operation  
ALT\_postop: ALT level one day after operation  
GGT\_postop: GGT level one day after operation  
ICU: stay on intensive care unit (days)  
hospstay: total hospital stay (days)  
dead: 1= dead, 0 = censored  
vitaldat: date of dead or censoring (days since January 1, 1960 )  
survival: days between operation and dead  
anastomoses: number of anastomoses  
diagnosis: 4=colorectal origin; 3= ovarian origin; 2= pseudomyxoma peritonei; else=1  
operationdat= date of operation (days since January 1, 1960 )
